# Supplementary material for: Structure of 5-hydroxymethylcytosine-specific restriction enzyme, AbaSI, in complex with DNA
Source: PubMed Central journal article supplement — Nucleic Acids Res. 2014 Jun 4;42(12):7947–59. doi: 10.1093/nar/gku497 (PMC4081097; doi:10.1093/nar/gku497), 2014-06-04
Supplement: supp_gku497_nar-00987-h-2014-File008.pdf [file supp_gku497_nar-00987-h-2014-File008.pdf]

**Supplementary Table S1. Summary of diffraction and refinement statistics of AbaSI crystals**

| PDB                                                             | 4PAR                       | 4PBA                                        | 4PBB                                              | -                                           | -                                           |
|-----------------------------------------------------------------|----------------------------|---------------------------------------------|---------------------------------------------------|---------------------------------------------|---------------------------------------------|
| AbaSI                                                           | C3S                        | C3S                                         | C3S                                               | C3S/SeMet                                   | C3S/SeMet                                   |
| DNA                                                             | 14 bp + 4 nt               | 32 bp                                       | -                                                 | 32 bp                                       | 32 bp                                       |
| <b>Data collection</b>                                          |                            |                                             |                                                   |                                             |                                             |
| Space group                                                     | $P2_1$                     | $P2_1$                                      | $P2_12_12_1$                                      | $P2_1$                                      | $P2_1$                                      |
| Cell dimensions                                                 | $\alpha=\gamma=90^\circ$ , | $\alpha=\gamma=90^\circ$ , $\beta=94^\circ$ | $\beta=94.6^\circ$ $\alpha=\beta=\gamma=90^\circ$ | $\alpha=\gamma=90^\circ$ , $\beta=94^\circ$ | $\alpha=\gamma=90^\circ$ , $\beta=94^\circ$ |
| a, b, c (Å)=                                                    | 54.8, 144.7, 105.0         | 55, 147, 104                                | 67, 92, 181                                       | 55, 146, 103                                | 55, 146, 104                                |
| Beamline (SERCAT)                                               | APS 22-ID                  | APS 22-ID                                   | APS 22-ID                                         | APS 22-ID                                   | APS 22-ID                                   |
| Wavelength (Å)                                                  | 1.00000                    | 0.97919                                     | 1.00000                                           | 0.97945                                     | 0.97945                                     |
| Resolution (Å)*                                                 | 34.90-2.89<br>(2.99-2.89)  | 35.09-3.29<br>(3.41-3.29)                   | 32.21-3.45<br>(3.61-3.45)                         | 39.30-3.59<br>(3.72-3.59)                   | 35.02-4.27<br>(4.44-4.27)                   |
| <sup>a</sup> $R_{\text{merge}}^*$                               | 0.089 (0.789)              | 0.211 (0.777)                               | 0.116 (0.820)                                     | 0.254 (0.950)                               | 0.211(0.624)                                |
| <sup>b</sup> $\langle I/\sigma \rangle^*$                       | 13.4 (1.4)                 | 6.4 (2.0)                                   | 9.8 (2.0)                                         | 12.7 (3.3)                                  | 21.8 (7.7)                                  |
| Completeness (%)*                                               | 98.6 (89.3)                | 99.9 (99.8)                                 | 99.9 (100.0)                                      | 99.8 (99.6)                                 | 100.0 (100.0)                               |
| Redundancy*                                                     | 3.7 (3.2)                  | 4.7 (4.0)                                   | 4.8 (5.0)                                         | 17.1 (16.3)                                 | 39.6 (38.8)                                 |
| Observed reflections                                            | 134,083                    | 113,556                                     | 73,539                                            | 317,558                                     | 450,551                                     |
| Unique reflections*                                             | 35,953 (3209)              | 24,388 (2450)                               | 15,301 (1495)                                     | 18,543 (1828)                               | 11,381(1113)                                |
|                                                                 |                            |                                             |                                                   | (17,741 have both $I^+$ and $I^-$ )         | (10,774 have both $I^+$ and $I^-$ )         |
| Mean FOM (SAD):                                                 |                            |                                             |                                                   | 0.34                                        | 0.45                                        |
| Density Modification, R-factor                                  |                            |                                             |                                                   | 0.278                                       | 0.328                                       |
| <b>Refinement</b>                                               |                            |                                             |                                                   |                                             |                                             |
| Resolution (Å)                                                  | 2.89                       | 3.29                                        | 3.45                                              |                                             |                                             |
| No. reflections                                                 | 35,850                     | 24,348                                      | 15,029                                            |                                             |                                             |
| <sup>c</sup> $R_{\text{work}}$ / <sup>d</sup> $R_{\text{free}}$ | 0.194/0.251                | 0.249/0.288                                 | 0.254/0.297                                       |                                             |                                             |
| No. Atoms                                                       | 11,694                     | 10,742                                      | 5,214                                             |                                             |                                             |
| Protein                                                         | 10,386                     | 9,478                                       | 5,194                                             |                                             |                                             |
| DNA                                                             | 1,304                      | 1,264                                       | -                                                 |                                             |                                             |
| B Factors (Å <sup>2</sup> )                                     |                            |                                             |                                                   |                                             |                                             |
| Protein                                                         | 95.6                       | 93                                          | 111                                               |                                             |                                             |
| DNA                                                             | 104.2                      | 129                                         | -                                                 |                                             |                                             |
| <b>R.m.s. deviations</b>                                        |                            |                                             |                                                   |                                             |                                             |
| Bond lengths (Å)                                                | 0.003                      | 0.003                                       | 0.003                                             |                                             |                                             |
| Bond angles (°)                                                 | 0.64                       | 0.77                                        | 0.97                                              |                                             |                                             |

\* Values in parenthesis correspond to highest resolution shell.

<sup>a</sup>  $R_{\text{merge}} = \sum |I - \langle I \rangle| / \sum I$ , where  $I$  is the observed intensity and  $\langle I \rangle$  is the averaged intensity from multiple observations.

<sup>b</sup>  $\langle I/\sigma \rangle =$  averaged ratio of the intensity ( $I$ ) to the error of the intensity ( $\sigma$ ).

<sup>c</sup>  $R_{\text{work}} = \sum |F_{\text{obs}} - F_{\text{cal}}| / \sum |F_{\text{obs}}|$ , where  $F_{\text{obs}}$  and  $F_{\text{cal}}$  are the observed and calculated structure factors, respectively.

<sup>d</sup>  $R_{\text{free}}$  was calculated using a randomly chosen subset (5%) of the reflections not used in refinement.
